# Supplementary material for: GDF15 linked to maternal risk of nausea and vomiting during pregnancy
Source: Springer Nature journal article supplement (doi:10.1038/s41586-023-06921-9), 2023-12-13

---

**Supplementary information**

---

**GDF15 linked to maternal risk of nausea and vomiting during pregnancy**

---

In the format provided by the  
authors and unedited

## Uncropped blots (related to Extended Data Figures 3A, 3B)

### Extended Data Figure 3A:

Calnexin levels are shown in Extended Data Figure 3A as loading controls.

Immunoblotting using anti-calnexin antibodies (chemiluminescence) was performed on the portion of the membrane showing molecular weight markers positions larger than ~65 kDa (epi-white illumination).

The red box shows region of interest shown in Extended Data Figure 3A.

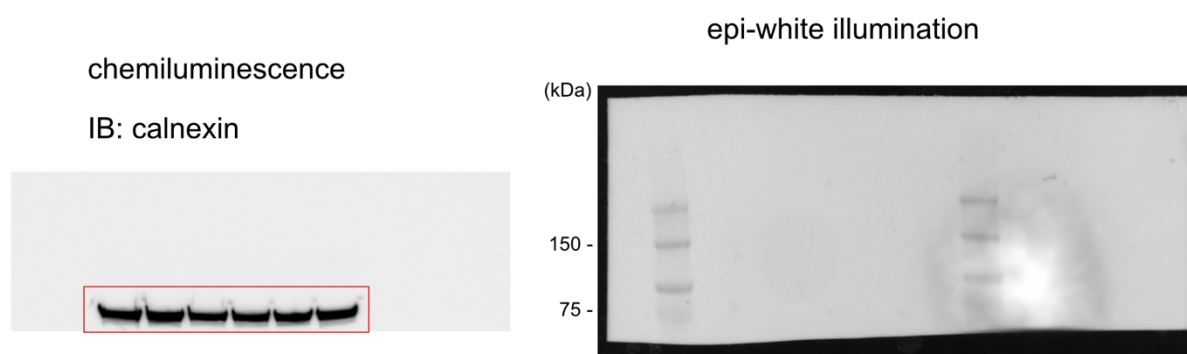

### Extended Data Figure 3B:

Calnexin levels are shown in Extended Data Figure 3B as loading controls.

Immunoblotting using anti-calnexin antibodies (chemiluminescence) was performed on the portion of the membrane showing molecular weight markers positions larger than ~65 kDa (epi-white illumination).

The red box shows region of interest shown in Extended Data Figure 3B.

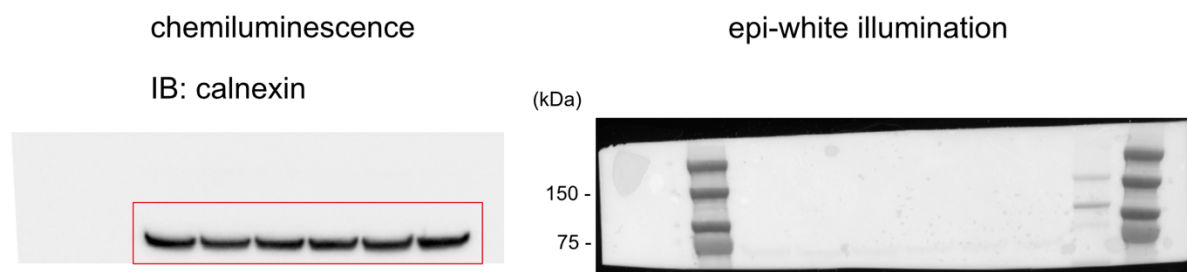

Supplement: MOESM1 [file 41586_2023_6921_MOESM1_ESM.pdf]
